# Supplementary material for: Prevalence of Self-Reported Gluten Sensitivity and Adherence to a Gluten-Free Diet in Argentinian Adult Population
Source: PubMed Central journal article supplement (PMC5295125; doi:10.3390/nu9010081), 2017-01-21
Supplement: nutrients-09-00081-s001.pdf [file nutrients-09-00081-s001.pdf]

# Supplementary Materials: Prevalence of Self-Reported Gluten Sensitivity and Adherence to a Gluten-Free Diet in Argentinian Adult Population

Francisco Cabrera-Chávez, Gimena V. A. Dezar, Anna P. Islas-Zamorano, Jesús G. Espinoza-Alderete, Marcela J. Vergara-Jiménez, Dalia Magaña-Ordorica and Noé Ontiveros

## S1. English and Spanish Versions of the Questionnaire

### English Version.

Please indicate with an X the answer to each of the following questions

1. Do you have some discomfort or adverse reaction when consuming wheat products?

Yes (Go to question 2, please answer only section 1)

No (Go to question 20, please answer only section 2)

ID: \_\_\_\_\_ Full Name: \_\_\_\_\_ Age: \_\_\_\_\_ Date of birth: \_\_\_\_\_ // Female  
Male \_\_\_\_\_ Level of education \_\_\_\_\_  
Home Phone: \_\_\_\_\_ Cel/mobile: \_\_\_\_\_ Email: \_\_\_\_\_

### SECTION 1

2. Have you ever been diagnosed with a disease related to the consumption of wheat or gluten?

Yes (which of the following?)

No (go to question 5)

- a) Wheat allergy
- b) Dermatitis herpetiformis
- c) Coeliac disease
- d) Wheat or gluten ataxia
- e) Sensitivity or intolerance to wheat
- f) Other (Which one?)

3. Who made the diagnosis?

- a) Physician or General Practitioner (GP)
- b) Gastroenterologist
- c) Homeopath
- d) Chemist
- e) Dietitian
- f) Nutritionist
- g) Other, who?

4. How long ago have you been diagnosed with the disease related to the consumption of wheat? (If you do not remember, please give us an estimate)

- a) 3 months or less
- b) 6 months or less
- c) One year or less
- d) 1–5 years or less
- e) 6–10 years
- f) Over 10 years

5. What kind of discomfort or gastrointestinal symptoms have you shown repeatedly by consuming foods with wheat or gluten?
  - a) Stomach pain
  - b) Diarrhea
  - c) Vomiting
  - d) Nausea
  - e) Reflux
  - f) Upset stomach
  - g) Bloating
  - h) Abdominal bloating
  - i) Constipation
  - j) Acidity
  - k) Other (Which one?)
  - l) None (Please go to question 9)
  
6. What age were you when you first realized that foods with wheat or gluten caused you the symptoms mentioned in the previous question? \_\_\_\_\_
  - a) I do not remember
  
7. When you eat food with wheat or gluten, how often gastrointestinal symptoms mentioned above occur?
  - a) Always
  - b) Most of the times
  - c) Occasionally
  
8. After eating foods with wheat or gluten, how long it takes for gastrointestinal symptoms referred above to appear?
  - a) 10 min or less
  - b) 10 min–1 h
  - c) 1–2 h
  - d) In the first 6 h
  - e) Between 6 and 24 h
  - f) After 24 h
  - g) Do not know
  
9. What kind of discomfort or no bowel symptoms have you had repeatedly by consuming foods with wheat or gluten?
  - a) Hives or rashes that itch
  - b) Difficulty breathing
  - c) Swelling of face or lips
  - d) Fatigue
  - e) Muscle pain
  - f) Pain in the joints
  - g) Lack of Wellbeing
  - h) Rhinitis
  - i) Dermatitis
  - j) Anxiety
  - k) Confusion

- l) Headache
  - m) Numbness
  - n) Depression
  - o) Other (Which one?)
  - p) None (If you choose this option, please go to question 13)
10. What age were you when you first realized that foods with wheat or gluten caused you the symptoms mentioned in the previous question? \_\_\_\_\_
- a) I do not remember
11. When you eat foods with wheat or gluten, how often the non-intestinal discomfort or symptoms mentioned above occur?
- a) Always
  - b) Most of the times
  - c) Occasionally
12. After eating foods with wheat or gluten, how long it takes for discomfort referred above to appear?
- a) 10 min or less
  - b) 10 min–1 h
  - c) 1–2 h
  - d) In the first 6 h
  - e) Between 6 and 24 h
  - f) After 24 h
  - g) Do not know
13. Have you been diagnosed with any of the following?
- a) Irritable bowel syndrome
  - b) Lactose intolerance
  - c) Intolerance to food other than lactose (which one?)
  - d) Allergy (Which one?)
  - e) Any type of psychiatric disorder?
  - f) Gastrointestinal cancer
  - g) Eating disorder (which one?)
  - h) Autoimmune disease such as diabetes mellitus.
  - i) Colitis
  - j) None of the previous diseases
14. Does anyone in your family have been diagnosed with coeliac disease?
- a) Yes
  - b) No
  - c) Do not know
15. Do you keep a diet free of wheat or gluten?
- a) Yes (**go to the next question**)
  - b) No (**go to question 18**)

16. Who instructs the diet free of wheat or gluten?
- Nutritionist
  - Dietitian
  - Physician or General practitioner
  - Gastroenterologist
  - Chemist
  - Homeopath
  - Yourself
  - Other, who?
17. What are the main motivations for keeping a diet free of wheat or gluten?
- Weight control
  - Having a relative with celiac disease or wheat/gluten sensitivity or intolerance
  - The gluten-free products taste better
  - A diet free of wheat or gluten is healthier
  - The symptoms triggered after gluten ingestion
  - Other reason, which one?

**(Stop)**

18. Do you avoid, as much as possible, wheat- or gluten-based products from your diet?
- Yes (**Go to the next question**)
  - No (**Stop**)
19. What are the main motivations for avoiding, as much as possible, wheat or gluten from your diet?
- The symptoms triggered after gluten ingestion
  - Weight control
  - Having a relative with celiac disease or wheat/gluten sensitivity or intolerance
  - The gluten-free products taste better
  - Avoiding wheat or gluten is healthy
  - Other reason, which one?

**Thank you very much!**

**SECTION 2**

20. Do you have some discomfort or adverse reaction when consuming a particular food?
- Yes (Go to next question)
  - No (Please go to question 26)
21. What type of food caused you discomfort or an adverse reaction when you consume it? \_\_\_\_\_
- Do not know
22. What kind of discomfort or gastrointestinal symptoms have you had repeatedly when you consume a particular type of food (s)?
- Stomachache

- b) Diarrhea
  - c) Vomiting
  - d) Nausea
  - e) Reflux
  - f) Flatulence
  - g) Bloating
  - h) Abdominal discomfort
  - i) Constipation
  - j) Acidity
  - k) Other (Which one?)
  - l) None (Please go to question 24)
23. When you eat foods that cause you discomfort, how often gastrointestinal symptoms mentioned above occur?
- a) Always
  - b) Most of the times
  - c) Occasionally
24. What kind of non-bowel symptoms have you had repeatedly by consuming foods that cause you discomfort?
- a) Hives or rashes that itch
  - b) Trouble breathing
  - c) Swelling of face or lips
  - d) Fatigue
  - e) Muscle pain
  - f) Joint Pain
  - g) Lack of Wellbeing
  - h) Anxiety
  - i) Confusion
  - j) Depression
  - k) Dermatitis
  - l) Rhinitis
  - m) Headache
  - n) Numbness
  - o) Other (Which one?)
  - p) None (If you choose this option, go to question 26)
25. When you eat foods that cause you discomfort, how often the non-intestinal symptoms mentioned above occur?
- a) Always
  - b) Often
  - c) Occasionally
26. Have you been diagnosed with any of the following diseases?
- a) Lactose intolerance
  - b) Intolerance to food other than lactose (Which one?)
  - c) Any type of allergy
  - d) Any type of psychiatric disorder
  - e) Gastrointestinal cancer

- f) Eating disorder (Which one?)
  - g) Autoimmune disease such as diabetes mellitus.
  - h) Colitis
  - i) Irritable Bowel Syndrome
  - j) None of the previous diseases
27. Does anyone in your family have been diagnosed with celiac disease?
- a) Yes
  - b) No
  - c) Do not know
28. Do you keep a diet free of wheat or gluten?
- a) Yes (go to the next question)
  - b) No (go to question 31)
29. Who instructs the diet free of wheat or gluten?
- a) Nutritionist
  - b) Dietitian
  - c) Physician or General practitioner
  - d) Gastroenterologist
  - e) Chemist
  - f) Homeopath
  - g) Yourself
  - h) Other, who?
30. What are the main motivations for keeping a diet free of wheat or gluten?
- a) Weight control
  - b) Having a relative with celiac disease or wheat/gluten sensitivity or intolerance
  - c) The gluten-free products taste better
  - d) A diet free of wheat or gluten is healthier
  - e) Other reason, which one?

**Stop**

31. Do you avoid, as much as possible, wheat- or gluten-based products from your diet?

Yes (**go to the next question**)

No (**stop**)

32. What are the main motivations for avoiding, as much as possible, wheat or gluten from your diet?
- a) Weight control
  - b) Having a relative with celiac disease or wheat/gluten sensitivity or intolerance
  - c) The gluten-free products taste better
  - d) Avoiding wheat or gluten is healthy
  - e) Other reason, which one?

**Thank you very much!**

**Spanish version.**

1. Presenta algún tipo de malestar o reacción adversa cuando consume productos de trigo, como los elaborados con harina de trigo?

Sí (pase a la pregunta 2; contesta la sección 1)

---

No (pase a la pregunta 20, contesta la sección 2)

---

ID:\_\_\_\_ Nombre (opcional):\_\_\_\_\_ Edad (**importante**):\_\_\_\_\_

Femenino  Masculino

Escolaridad (último grado de estudios obtenido):\_\_\_\_\_

Contacto (opcional): Email \_\_\_\_\_ Teléfono \_\_\_\_\_

**Por favor señale con una X la respuesta para cada una de las siguientes preguntas**

## SECCIÓN 1

---

2. Le han diagnosticado alguna enfermedad relacionada al consumo de trigo o gluten?

Sí (**cuál de las siguientes?**)  No (**pase a la pregunta 5**)

Alergia al trigo  Dermatitis herpetiformis  Enfermedad celiaca  Ataxia por gluten o trigo  
 Sensibilidad o intolerancia al trigo  Otro Cuál? \_\_\_\_\_

---

3. Quién realizó el diagnóstico?

Médico general  Gastroenterólogo  Médico homeópata  Químico  
 Nutricionista  Otro Quién? \_\_\_\_\_

---

4. Hace cuánto tiempo que fue usted diagnosticado con la enfermedad relacionada al consumo de trigo? \_\_\_\_\_  
(Si no recuerda denos un estimado por favor)

3 meses o menos  6 meses o menos  1 año o menos  1–5 años o menos  
 6–10 años  más de 10 años

---

5. Qué tipo de molestias o **síntomas gastrointestinales** ha presentado de forma repetida al consumir alimentos con trigo o gluten?

Dolor de estómago  Diarrea  Vómito  Nauseas  Reflujo  
 Flatulencias  Hinchazón de estómago  Malestar abdominal  Estreñimiento  
 Acidez  Otro Cuál?  Ninguno (**pase a la pregunta 9**)

---

6. Qué edad aproximadamente tenía cuando se percató de que los alimentos con trigo o gluten le ocasionaban los síntomas mencionados en la pregunta anterior? \_\_\_\_\_  o recuerdo

---

7. Cuando consume alimentos con trigo o gluten, con qué frecuencia se presentan los síntomas gastrointestinales mencionados anteriormente?

Siempre  Muchas veces  Ocasionalmente

---



8. Después de haber comido alimentos con trigo o gluten, Cuánto tiempo demoran en aparecer las molestias gastrointestinales referidas anteriormente?

- 10 min o menos     10 min–1 h     1–2 h     en las primeras 6 h     entre 6 y 24 h  
 Después de 24 h     No sabe
- 

9. Qué tipo de molestias o **síntomas no intestinales** ha presentado de forma repetida al consumir alimentos con trigo o gluten?

- Ronchas o sarpullidos que pican     Dificultad para respirar     Hinchazón de cara o labios  
 Cansancio     Dolor muscular     Dolor en las articulaciones     Falta de bienestar  
 Rinitis     Dermatitis     Ansiedad     Confusión     Depresión  
 Dolor de cabeza     Entumecimiento     Otro, Cuál?  
 Ninguno (**Si elige esta opción pase a la pregunta 13**)
- 

10. Qué edad aproximadamente tenía cuando se percató de que los alimentos con trigo o gluten le ocasionaban los síntomas mencionados en la pregunta anterior? \_\_\_\_\_  No recuerdo

---

11. Cuando consume alimentos con trigo o gluten, con qué frecuencia se presentan las molestias o **síntomas no intestinales** mencionados anteriormente?

- Siempre     Muchas veces     Ocasionalmente
- 

12. Después de haber comido alimentos con trigo o gluten, Cuánto tiempo demoran en aparecer las molestias **no intestinales** referidas anteriormente?

- 10 min o menos     10 min–1 h     1–2 h     en las primeras 6 h     Entre 6 y 24 h  
 Después de 24 h     No sabe
- 

13. Le han diagnosticado alguna de las siguientes enfermedades?

- Síndrome de intestino irritable     Intolerancia a la lactosa  
 Intolerancia a algún otro alimento, Cuál? \_\_\_\_\_  
 Alergia Cuál? \_\_\_\_\_ A  una enfermedad psiquiátrica Cuál? \_\_\_\_\_  
 Cáncer gastrointestinal     Trastorno de conducta alimentaria Cuál? \_\_\_\_\_  
 Enfermedad autoinmune como diabetes mellitus.     Colitis     Ninguna de las anteriores
-

14. Alguien en su familia ha sido diagnosticado con enfermedad celiaca?

- Sí             No             No sabe
- 

15. Lleva usted una dieta libre de trigo o gluten?

- Sí **(pase a la siguiente pregunta)**             No **(pase a la pregunta 18)**

16. Quién lo instruye para llevar la dieta libre de gluten?

- Nutricionista    Dietista    Médico general    Gastroenterólogo    Químico    Médico homeópata  
 Usted mismo             Otro, quien? \_\_\_\_\_.

17. Cuáles son las principales razones que lo motivan a llevar una dieta libre de gluten?

- Control de peso             Tiene un familiar con enfermedad celiaca o intolerancia al trigo  
 Los productos libres de gluten saben mejor             La dieta libre de gluten es más sana  
 Los síntomas que le ocasiona    Otra razón, cuál? \_\_\_\_\_ **(termina)**

18. Hace usted todo lo posible por no consumir trigo o gluten?

- Sí **(pase a la siguiente pregunta)**             No **(termina)**
- 

19. Qué lo motiva a hacer todo lo posible por evitar el trigo o gluten en su dieta?

- Los síntomas que le ocasiona     Control de peso    Los productos libre de gluten saben mejor  
 Tiene un familiar con enfermedad celiaca o intolerancia al trigo  
 Es sano evitar el trigo o gluten de la dieta             Otra razón, cuál? \_\_\_\_\_.

**¡Muchas Gracias por Participar!**

---

ID:\_\_\_\_\_Nombre (opcional):\_\_\_\_\_Edad (**importante**):\_\_\_\_\_

Femenino  Masculino

Escolaridad (último grado de estudios obtenido):\_\_\_\_\_.

Contacto (opcional): Email\_\_\_\_\_Teléfono\_\_\_\_\_.

**Por favor señale con una X la respuesta para cada una de las siguientes preguntas**

## SECCIÓN 2

---

20. Presenta algún tipo de malestar o reacción adversa cuando consume un alimento en particular **que no sea** elaborado con trigo o harina de trigo?

Sí (**pase a la siguiente pregunta**)  No (**pase a la pregunta 26**)

---

21. Que alimento(s) le ocasiona (n) malestar o una reacción adversa cuando lo(s) consume?

No sabe

---

22. Los malestares que presenta al consumir dicho(s) alimento(s), son algunos de los siguientes síntomas gastrointestinales?

Dolor de estómago  Diarrea  Vómito  Nausea  Reflujo  
 Flatulencias  Hinchazón de estómago  Malestar abdominal  Estreñimiento  
 Acidez  Otro, cuál? \_\_\_\_\_  Ninguno (**pase a la pregunta 24**)

---

23. Con qué frecuencia se presentan los malestares o síntomas gastrointestinales mencionados anteriormente?

Siempre que consume el alimento  La mayoría de las veces que lo consume  Ocasionalmente

---

24. Los malestares que presenta al consumir dicho(s) alimento(s), son algunos de los siguientes síntomas no intestinales?

Ronchas o sarpullidos que pican  Dificultad para respirar  Hinchazón de cara o labios  
 Cansancio  Dolor muscular  Dolor en las articulaciones  Falta de bienestar  
 Rinitis  Dermatitis  Ansiedad  Confusión  Depresión  Dolor de cabeza  
 Entumecimiento  Otro Cuál? \_\_\_\_\_  Ninguno (**pase a la pregunta 26**)

25. con qué frecuencia se presentan las molestias o síntomas **no intestinales** mencionados anteriormente?

Siempre que consume el alimento  La mayoría de las veces que lo consume  Ocasionalmente

---

26. Le han diagnosticado alguna de las siguientes enfermedades?

- Intolerancia a la lactose     Intolerancia a otro alimento Cuál? \_\_\_\_\_.
- Alergia Cuál? \_\_\_\_\_     Alguna enfermedad psiquiátrica Cuál? \_\_\_\_\_.
- Cáncer gastrointestinal     Trastorno de conducta alimentaria Cuál? \_\_\_\_\_.
- Diabetes mellitus.     Colitis     Síndrome de intestino irritable
- Ninguna de las anteriores
- 

27. Alguien en su familia ha sido diagnosticado con enfermedad celiaca?

- Sí     No     No sabe
- 

28. Lleva usted una dieta libre de trigo o gluten?

- No (**pase a la pregunta 31**)     Si (**continúe con la siguiente pregunta**)

29. Quién lo instruye para llevar la dieta libre de gluten?

- Nutricionista     Dietista     Médico general     Gastroenterólogo     Químico     Médico Homeópata
- Usted mismo     Otro, quien? \_\_\_\_\_

30. Cuáles son las principales razones que lo motivan a llevar una dieta libre de gluten?

- Control de peso     Tiene un familiar con enfermedad celiaca o intolerancia al trigo
- Los productos libres de gluten saben mejor     La dieta libre de gluten es más sana
- Otra razón, cuál? \_\_\_\_\_ (**Termina**)

31. Hace usted todo lo posible por no consumir trigo o gluten?

- Si (**pase a la siguiente pregunta**)     No (**Termina**)

32. Qué lo motiva a hacer todo lo posible por evitar el trigo o gluten en su dieta?

---

- Control de peso     Tiene un familiar con enfermedad celiaca o intolerancia al trigo
- Es sano evitar los productos con trigo o gluten     Los productos libres de gluten saben mejor
- Otra razón, cuál? \_\_\_\_\_.

**Muchas Gracias por Participar!**

---

S2. Tables and Figures

**Table S1.** Comparison between self-reported gluten sensitivity (SR-GS) and recurrent adverse reactions to foods different from wheat/gluten groups.

| Variable *                   | Recurrent Adverse Reactions   |       |                       |       | Odds Ratio (95% CI) |
|------------------------------|-------------------------------|-------|-----------------------|-------|---------------------|
|                              | Wheat/Gluten (N = 92) (SR-GS) |       | Other Foods (N = 102) |       |                     |
|                              | -----                         | n     | -----                 | n     |                     |
| Mean age in years (range) ** | 33.5 (18–74)                  | ----- | 33.4 (18–81)          | ----- | -----               |
| Gender (female/male) (%)     | 53.8/46.2                     | 49/42 | 68.6/30.4             | 71/31 | 0.51 (0.28–0.92)    |
| Irritable bowel syndrome (%) | 14.3                          | 13    | 11.8                  | 12    | 1.25 (0.54–2.90)    |
| Food intolerance (%)         | 3.3                           | 3     | 2.9                   | 3     | 1.12 (0.22–5.72)    |
| Allergy (%)                  | 11.0                          | 10    | 12.7                  | 13    | 0.85 (0.35–2.03)    |
| Psychiatric disease (%)      | 0                             | 0     | 3.9                   | 4     | -----               |
| Gastrointestinal cancer (%)  | 1.1                           | 1     | 0                     | 0     | -----               |
| Eating disorders (%)         | 4.4                           | 4     | 2.9                   | 3     | 1.52 (0.33–6.97)    |
| Autoimmune disease (%)       | 2.2                           | 2     | 2.9                   | 3     | 0.74 (0.12–4.54)    |
| Colitis (%)                  | 4.4                           | 4     | 1.0                   | 1     | 4.64 (0.51–42.33)   |
| Lactose intolerance (%)      | 6.6                           | 6     | 5.9                   | 6     | 1.13 (0.35–3.63)    |

\* Self-reported physician-diagnosed diseases were considered for analysis; \*\* Age comparison by student’s *t*-test (*p* > 0.05).

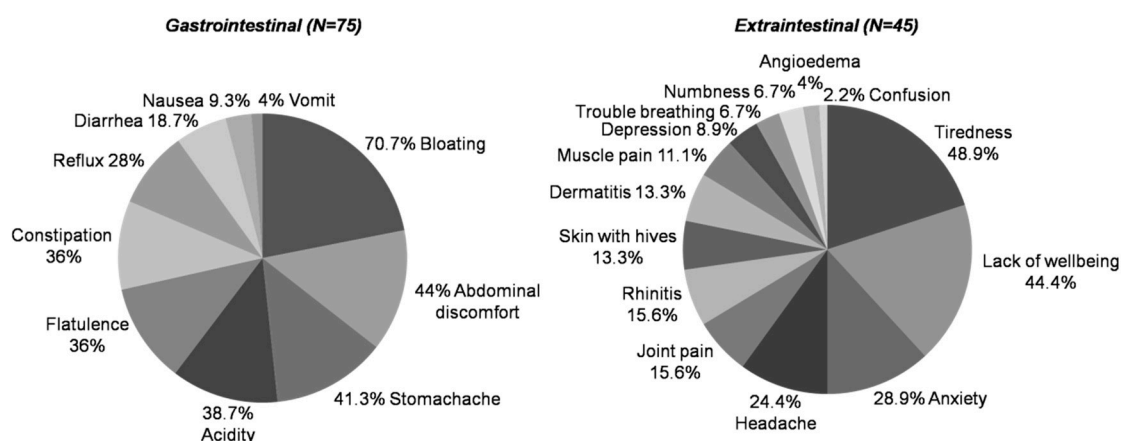

**Figure S1.** Self-reported symptoms in the SR-NCGS group.

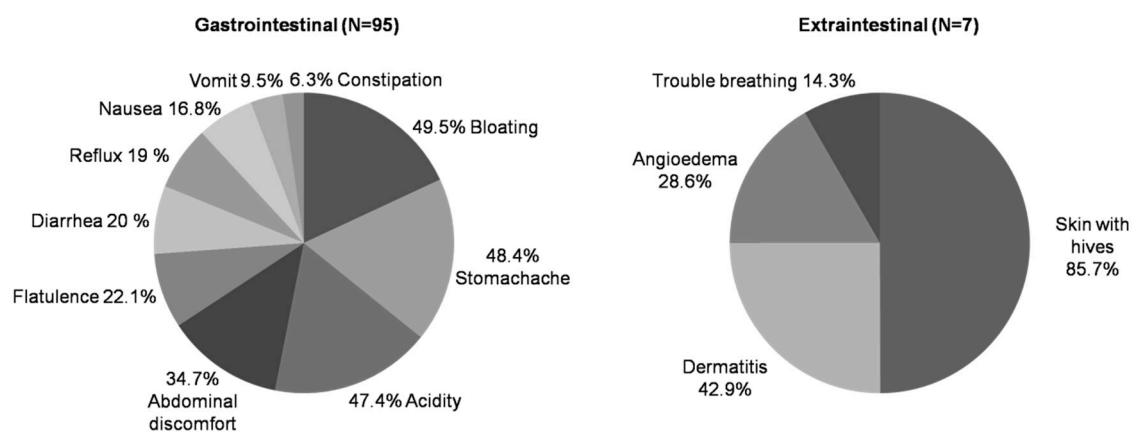

**Figure S2.** Recurrent self-reported symptoms in the adverse reactions to foods other than wheat/gluten group.

**Table S2.** Symptoms comparison between identified SR-GS and recurrent adverse reactions to foods other than wheat/gluten cases.

| Gastrointestinal Symptoms | Recurrent Adverse Reactions to |    |                                         |    | Odds Ratio (95% CI) |
|---------------------------|--------------------------------|----|-----------------------------------------|----|---------------------|
|                           | Wheat/Gluten (SR-GS) (N = 92)  |    | Foods Other Than Wheat/Gluten (N = 102) |    |                     |
|                           | %                              | n  | %                                       | n  |                     |
| Bloating                  | 70.1                           | 61 | 49.5                                    | 47 | 2.3 (1.3–4.1)       |
| Abdominal discomfort      | 47.1                           | 41 | 34.7                                    | 33 | 1.7 (0.9–3.0)       |
| Stomachache               | 46                             | 40 | 48.4                                    | 46 | 0.9 (0.5–1.7)       |
| Acidity                   | 36.8                           | 32 | 47.4                                    | 45 | 0.7 (0.4–1.2)       |
| Constipation              | 34.5                           | 30 | 6.3                                     | 6  | 7.7 (3.0–19.7)      |
| Flatulence                | 33.3                           | 29 | 22.1                                    | 21 | 1.8 (0.9–3.4)       |
| Reflux                    | 28.7                           | 25 | 19                                      | 18 | 1.7 (0.9–3.5)       |
| Diarrhea                  | 25.3                           | 22 | 20                                      | 19 | 1.4 (0.7–2.7)       |
| Nausea                    | 14.5                           | 13 | 16.8                                    | 16 | 0.9 (0.4–2.0)       |
| Vomit                     | 10.3                           | 9  | 9.5                                     | 9  | 1.1 (0.4–3.0)       |

  

| Extraintestinal Symptoms | Recurrent Adverse Reactions to |    |                                         |   | Odds Ratio (95% CI) |
|--------------------------|--------------------------------|----|-----------------------------------------|---|---------------------|
|                          | Wheat/Gluten (SR-GS) (N = 92)  |    | Foods Other Than Wheat/Gluten (N = 102) |   |                     |
|                          | %                              | n  | %                                       | n |                     |
| Tiredness                | 55.6                           | 25 | 0                                       | 0 | -----               |
| Lack of wellbeing        | 44.4                           | 20 | 0                                       | 0 | -----               |
| Anxiety                  | 28.9                           | 13 | 0                                       | 0 | -----               |
| Skin with hives          | 26.7                           | 12 | 85.7                                    | 6 | 2.4 (0.9–6.7)       |
| Headache                 | 26.7                           | 12 | 0                                       | 0 | -----               |
| Dermatitis               | 15.6                           | 7  | 42.9                                    | 3 | 2.7 (0.7–10.8)      |
| Rhinitis                 | 15.6                           | 7  | 0                                       | 0 | -----               |
| Angioedema               | 13.3                           | 6  | 28.6                                    | 2 | 3.5 (0.7–17.7)      |
| Muscle pain              | 13.3                           | 6  | 0                                       | 0 | -----               |
| Joint pain               | 13.3                           | 6  | 0                                       | 0 | -----               |
| Depression               | 13.3                           | 6  | 0                                       | 0 | -----               |
| Trouble breathing        | 8.9                            | 4  | 14.3                                    | 1 | 4.6 (0.5–41.8)      |
| Numbness                 | 6.7                            | 3  | 0                                       | 0 | -----               |
| Confusion                | 2.2                            | 1  | 0                                       | 0 | -----               |

**Table S3.** Motivations for following a GFD and avoiding wheat/gluten-containing foods.

| Motivations                       | Comparisons between SR-GS and Non-SR-GS Groups |               |         |                       |               |         |
|-----------------------------------|------------------------------------------------|---------------|---------|-----------------------|---------------|---------|
|                                   | GFD                                            |               | p Value | Avoiding Wheat/Gluten |               | p Value |
|                                   | SR-GS                                          | Non-SR-GS     |         | SR-GS                 | Non-SR-GS     |         |
| Weight control                    | 6<br>(27.3%)                                   | 29<br>(57.7%) | 0.037   | 4<br>(8.7%)           | 95<br>(63.8%) | <0.001  |
| Relative with CD                  | 2<br>(9.1%)                                    | 2<br>(3.6%)   | 0.321   | 0                     | 6<br>(4.0%)   | -----   |
| Gluten-free products taste better | 0                                              | 1<br>(1.8%)   | -----   | 0                     | 2             | -----   |
| GFD is healthier                  | 3<br>(13.6%)                                   | 22<br>(40.0%) | 0.021   | -----                 | -----         | -----   |
| Avoiding gluten is healthy        | -----                                          | -----         | -----   | 2<br>(4.3%)           | 31<br>(20.8%) | 0.005   |

**Table S4.** Motivations for following a GFD and who instructs the GFD in the SR-GS group stratified by gender.

| <b>Motivations for Following a GFD</b> |          |                       |                         |                                          |                         |                      |
|----------------------------------------|----------|-----------------------|-------------------------|------------------------------------------|-------------------------|----------------------|
| <b>Gender</b>                          | <b>N</b> | <b>Weight Control</b> | <b>Relative with CD</b> | <b>Gluten-Free Products Taste Better</b> | <b>GFD is Healthier</b> | <b>Symptoms Only</b> |
| Female                                 | 15       | 5 (33.3%)             | 2 (13.3%)               | 0                                        | 1 (6.7%)                | 7 (46.7%)            |
| Male                                   | 7        | 1 (14.3%)             | 0                       | 0                                        | 2 (28.6%)               | 4 (57.1%)            |
| <b>Who Instructs the GFD</b>           |          |                       |                         |                                          |                         |                      |
| <b>Gender</b>                          | <b>N</b> | <b>Dietitian</b>      | <b>Yourself</b>         | <b>Physician</b>                         | <b>Other</b>            | <b>-----</b>         |
| Female                                 | 15       | 6 (40%)               | 8 (53.3%)               | 1 (6.7%)                                 | 0                       | -----                |
| Male                                   | 7        | 3 (42.9%)             | 4 (57.1%)               | 0                                        | 0                       | -----                |
